# Supplementary material
Source: MDPI journal article supplement (https://www.mdpi.com/2073-4441/15/10/1954)
Supplement: s1 [file s1]

## The Surface-to-Atmosphere GHG Fluxes in Rewetted and Permanently Flooded Former Peat Extraction Areas Compared to Pristine Peatland in Hemiboreal Latvia

Arta Bārdule, Aldis Butlers, Gints Spalva, Jānis Ivanovs, Raitis Normunds Meļņiks, Ieva Līcīte and Andis Lazdiņš

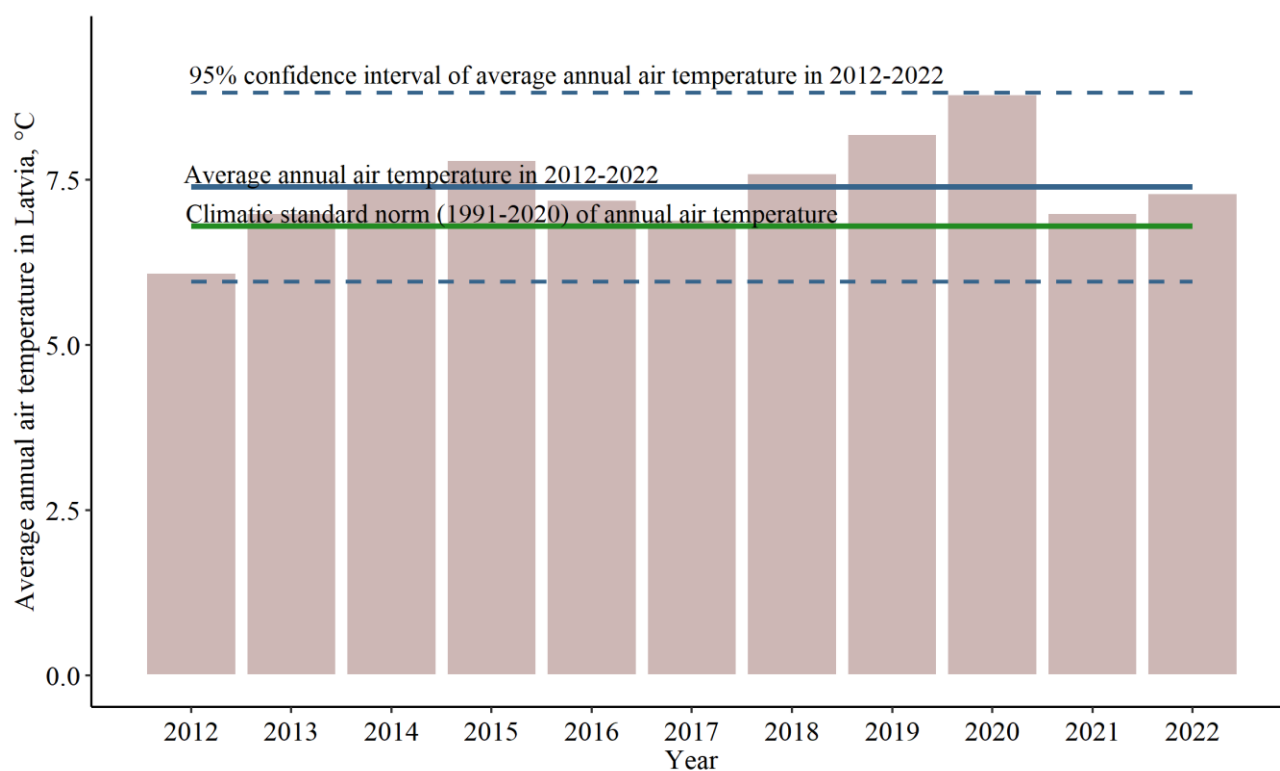

Figure S1. Average annual air temperature in Latvia in 2012-2022 [1].

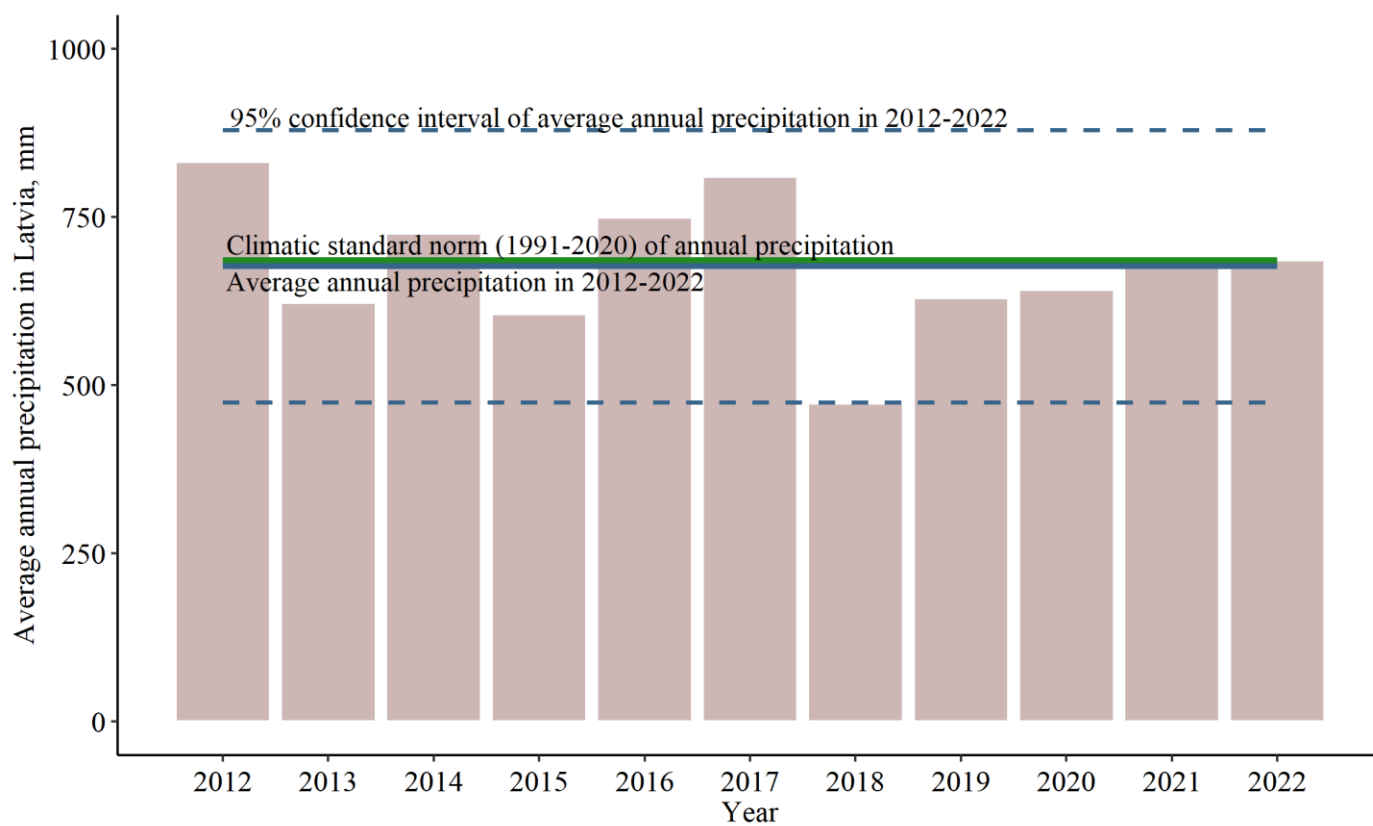

**Figure S2.** Average annual precipitation in Latvia in 2012-2022 [1].

## References

1. Latvian Environment, Geology and Meteorology Centre. Meteorological Network. Available online: [https://klimats.meteo.lv/klimats/latvijas\\_klimats/](https://klimats.meteo.lv/klimats/latvijas_klimats/) (accessed on 12 April 2023).
